# Supplementary material for: Protocol: Adeno-Associated Virus-Mediated Gene Transfer in Ex Vivo Cultured Embryonic Mammary Gland
Source: Springer Nature journal article supplement (doi:10.1007/s10911-020-09461-4), 2020-10-02

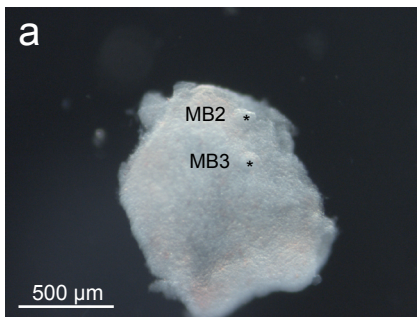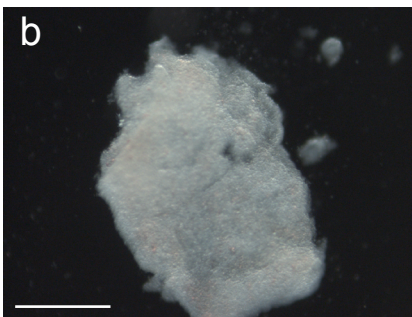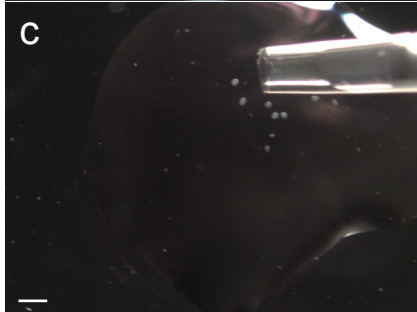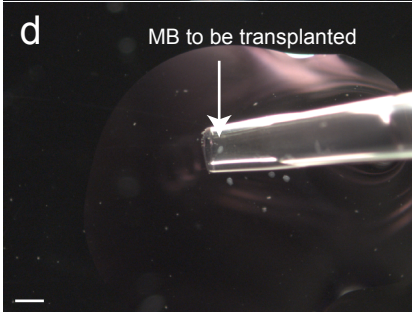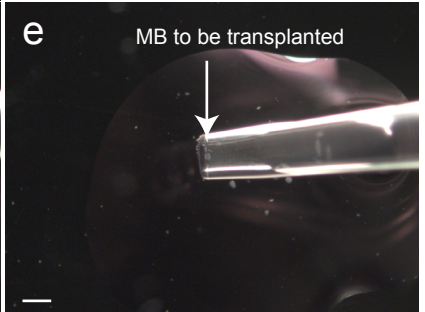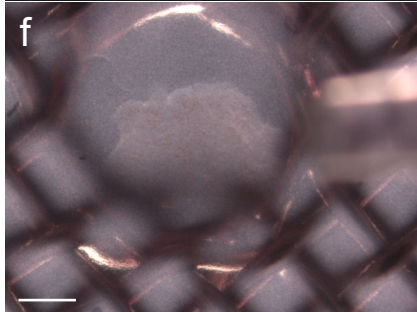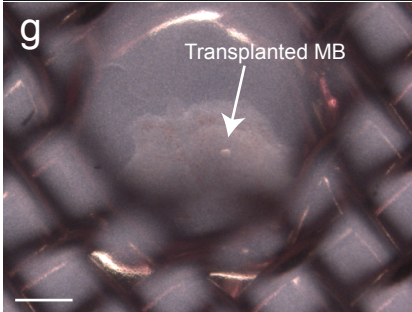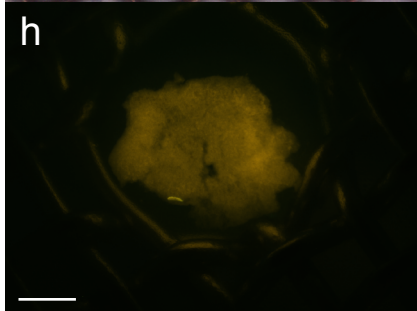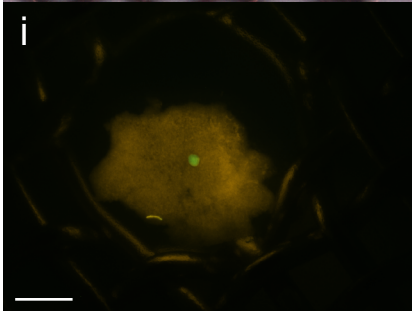

Supplement: MOESM1 [file 18442076]
